# Supplementary material for: Efficacy and Safety of Prophylactic Agents in Prevention of Retinopathy of Prematurity: A Systematic Review and Meta-analysis of Randomised Controlled Trials
Source: PubMed Central journal article supplement — BMJ Open Ophthalmol. 2024 Dec 25;9(1):e001910. doi: 10.1136/bmjophth-2024-001910 (PMC11683937; doi:10.1136/bmjophth-2024-001910), 2024-12-25
Supplement: bmjophth-9-1-s001.pdf [file bmjophth-9-1-s001.pdf]

## 1 Supplementary Data

The search strategy for MEDLINE, Embase, and CENTRAL was performed on 10/7/2022 (n=380)

1. exp premature birth/or exp Infant, Premature, Diseases/ or exp Infant, Premature/ or exp Obstetric Labor, Premature/ or exp Infant, Extremely Premature/
2. Exp Infant, Extremely Low Birth Weight/ or Exp Infant, Low Birth Weight/ or Exp Infant, Newborn/ or Exp Infant, Small for Gestational Age/ or Exp Infant, Very Low Birth Weight/ or Exp Infant, Extremely Premature/ or Exp Infant/ or Exp Infant, Premature Diseases
3. Premature\$.mp.
4. Infant\$.mp.
5. Newborn\$.mp.
6. Low Birth Weight\$.mp.
7. 1 or 2 or 3 or 4 or 5 or 6
8. Exp < "> <" > Retinopathy of Prematurity
9. exp retrolental fibroplasia/
10. Retinopathy of Prematurity mp.
11. Retrolental fibroplasia\$.mp.
12. 8 or 9 or 10 or 11

13. exp Vitamin A/
14. Vitamin A\$.mp.
15. Retinol\$.mp.
16. Fat\$.mp.
17. exp Fatty Acids/
18. Fatty acid\$.mp.
19. exp Fatty Acids, Omega-3/
20. Omega-3\$.mp.
21. exp Fatty Acids, Omega-6/
22. Omega-6\$.mp.
23. exp Propranolol/
24. Propranolol\$.mp.
25. Inderal\$.mp.
26. Anaprilin\$.mp.
27. Obsidan\$.mp.
28. Obzidan\$.mp.

- 29. Beta blocker\$.mp.
- 30. 13 or 14 or 15 or 16 or 17 or 18 or 19 or 20 or 21 or 22 or 23 or 24 or 25 or 26 or 27 or 28 or 29
- 31. exp Randomized controlled trial/exp Clinical trials/
- 32. Trial\$.mp.
- 33. 31 or 32
- 34. 7 and 12 and 30 and 33

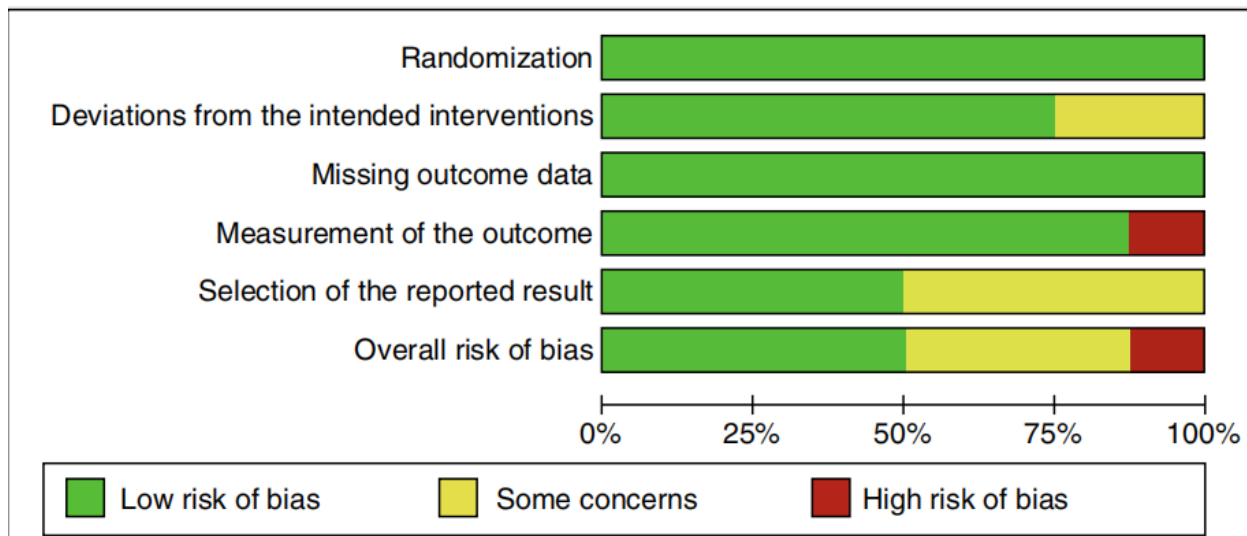

Supplementary Figure 1:

ROB results

|                | Randomization | Deviations from the intended interventions | Missing outcome data | Measurement of the outcome | Selection of the reported result | Overall risk of bias |
|----------------|---------------|--------------------------------------------|----------------------|----------------------------|----------------------------------|----------------------|
| Basu 2019      | +             | +                                          | +                    | +                          | +                                | +                    |
| Hellström 2021 | +             | +                                          | +                    | +                          | +                                | +                    |
| Korkmaz 2016   | +             | ?                                          | +                    | +                          | ?                                | ?                    |
| Mactier 2012   | +             | +                                          | +                    | +                          | +                                | +                    |
| Ozturk 2019    | +             | +                                          | +                    | +                          | ?                                | ?                    |
| Sanghvi 2017   | +             | +                                          | +                    | +                          | +                                | +                    |
| Shenai 1987    | +             | ?                                          | +                    | +                          | ?                                | ?                    |
| Wardle 2001    | +             | +                                          | +                    | -                          | ?                                | -                    |

Supplementary Figure 2: ROB results

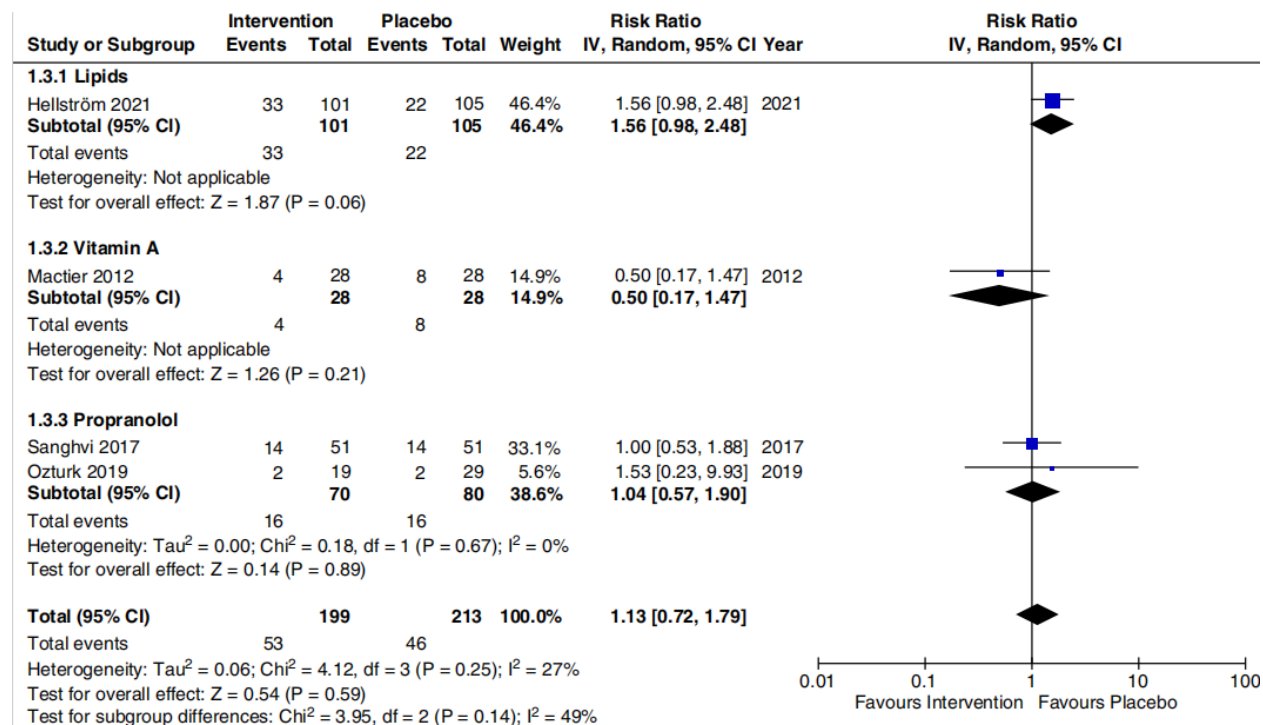

Supplementary Figure 3: Meta-analysis of ROP stage 1

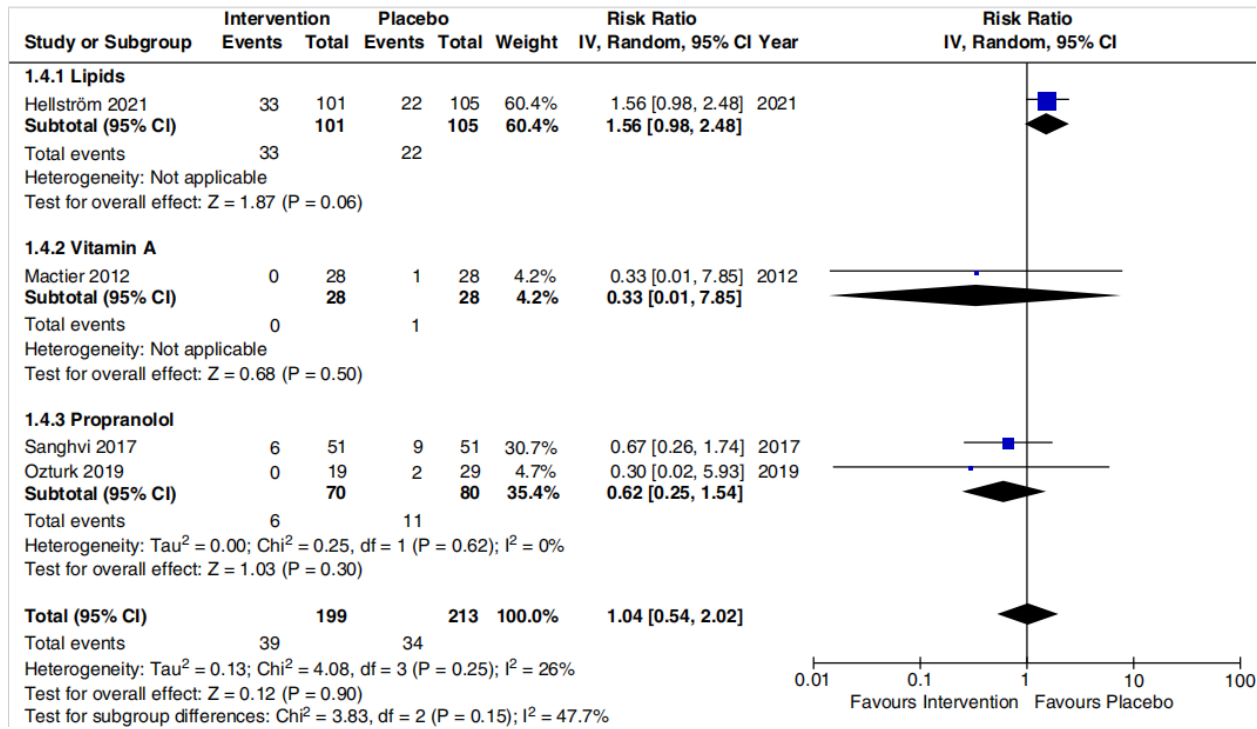

Supplementary Figure 4: Meta-analysis of ROP stage 2

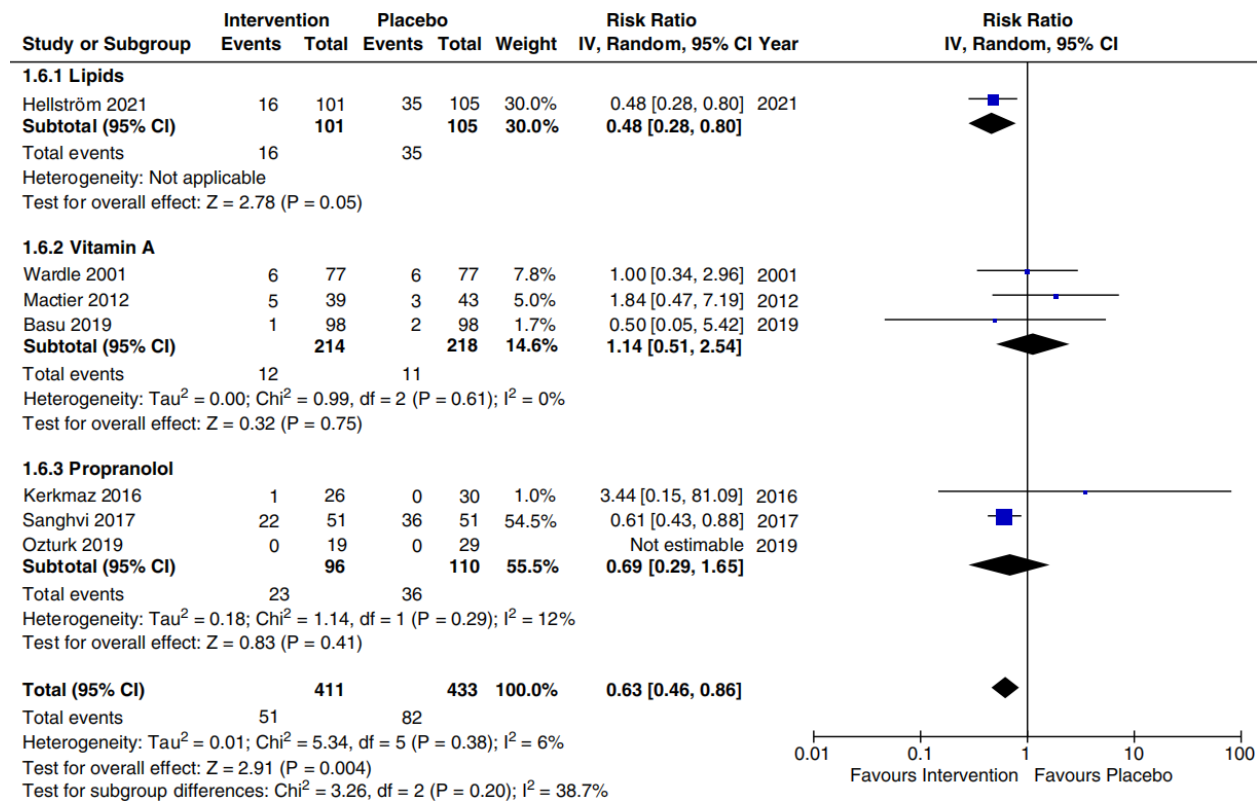

Supplementary Figure 5: Meta-analysis of ROP stage 3

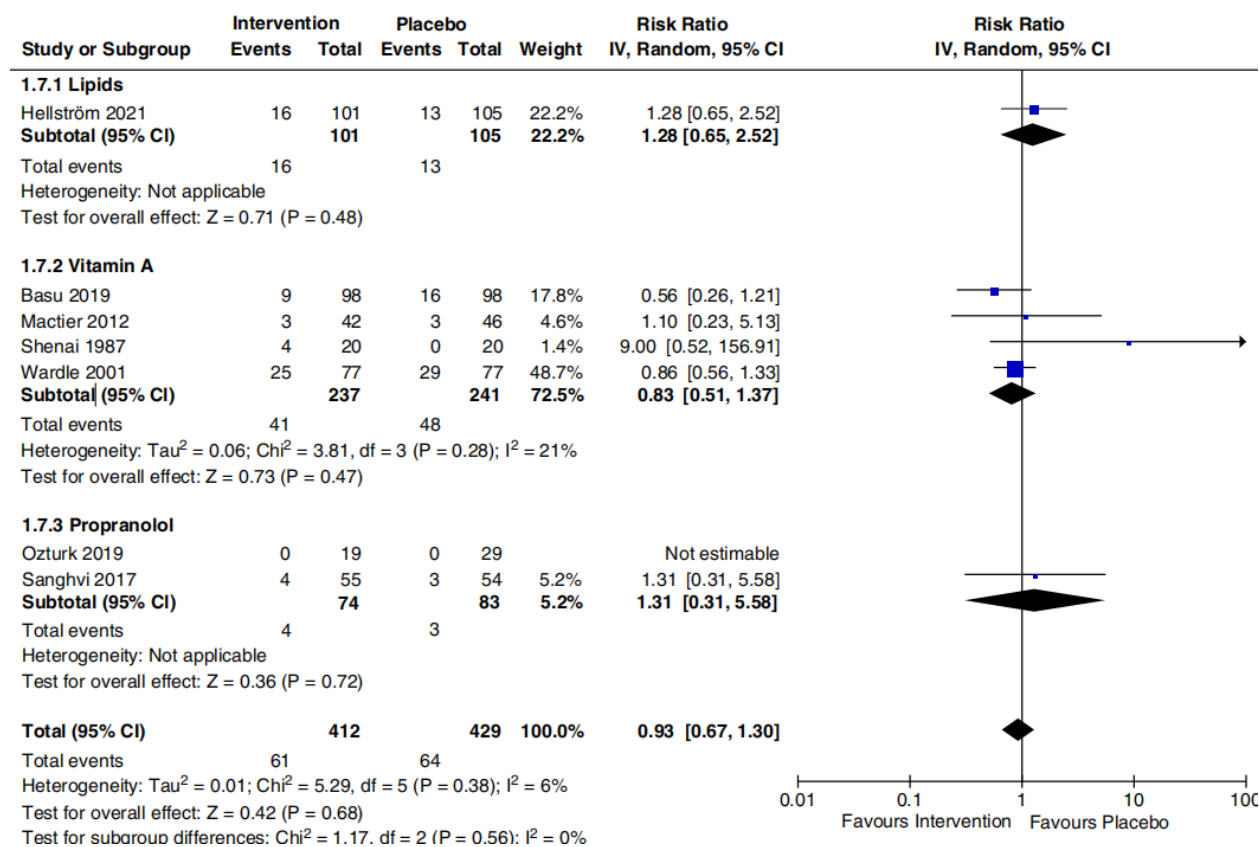

Supplementary Figure 6: meta-analysis of mortality rate

Supplementary table: Characteristics of the Included Studies

| Author, year | Intervention | Intervention specifics |       |                             |                     | Number of Participants |         | Gestational Age (weeks) |         | Mean birth weight (grams) |         | Gender |        | Measured outcomes |
|--------------|--------------|------------------------|-------|-----------------------------|---------------------|------------------------|---------|-------------------------|---------|---------------------------|---------|--------|--------|-------------------|
|              |              | Dose                   | Route | Time of initiation/duration | Serum concentration | Intervention           | Placebo | Intervention            | Placebo | Intervention              | Placebo | Male   | Female |                   |



|              |           |          |              |                                                                                                                         |                                                                                                                                                  |    |    |                  |                    |                   |                 |                                             |                                             |                                                                                                                                                                          |
|--------------|-----------|----------|--------------|-------------------------------------------------------------------------------------------------------------------------|--------------------------------------------------------------------------------------------------------------------------------------------------|----|----|------------------|--------------------|-------------------|-----------------|---------------------------------------------|---------------------------------------------|--------------------------------------------------------------------------------------------------------------------------------------------------------------------------|
| Shenai 1987  | Vitamin A | 2000 IU  | IM injection | Postnatal day 4 and every other day thereafter for a total of 14 injections over 28 days                                | <b>Day 4 of life (before)</b> = 20 µg/dL, <b>Day 10</b> = 40 µg/dL, <b>Day 17</b> = 30 µg/dL, <b>Day 24</b> = 25 µg/dL, <b>Day 31</b> = 35 µg/dL | 20 | 20 | 27.9 ± 1.3       | 28.0 ± 1.3         | 1006 ± 163        | 976 ± 162       | Intervention: 10 (50%)<br>Control: 10 (50%) | Intervention: 10 (50%)<br>Control: 10 (50%) | Occurrence of BPD, pulmonary air dissection, symptomatic patent ductus arteriosus, sepsis, airway infection, intraventricular hemorrhage, and retinopathy of prematurity |
| Mactier 2012 | Vitamin A | 10000 IU | IM injection | 3 times weekly from day 2, continued until commencement of oral supplementation on day 14, or for a maximum of 12 doses | <b>Day 1</b> = 0.5 (0.28) µmol/L, <b>Day 7</b> = 1.0 (0.60) µmol/L, <b>Day 28</b> = 0.7 (0.35) µmol/L,                                           | 42 | 47 | 29.3 (24.0-33.0) | 29.3 (24.3 - 32.6) | 1102.5 (630-1800) | 1150 (580-1770) | NR                                          | NR                                          | The primary outcome was cone-corrected, dark-adapted, retinal sensitivity at 36 weeks; associations were also sought between total vitamin A intake, and plasma retinol  |

|             |           |             |      |                                                   |                                                                                                                   |    |    |                          |                          |                             |                             |                                             |                                             |                                                                                   |
|-------------|-----------|-------------|------|---------------------------------------------------|-------------------------------------------------------------------------------------------------------------------|----|----|--------------------------|--------------------------|-----------------------------|-----------------------------|---------------------------------------------|---------------------------------------------|-----------------------------------------------------------------------------------|
|             |           |             |      |                                                   |                                                                                                                   |    |    |                          |                          |                             |                             |                                             |                                             | levels and ROP.                                                                   |
| Wardle 2001 | Vitamin A | 5000 IU/day | Oral | Postnatal day 1 starting immediately until day 28 | Intervention median (IQR): 0.13 (0.08–0.26) at baseline<br><br>Control median (IQR): 0.13 (0.08–0.22) at baseline | 77 | 77 | Median (IQR): 26 (25–27) | Median (IQR): 26 (25–27) | Median (IQR): 806 (710–890) | Median (IQR): 782 (662–880) | Intervention: 37 (48%)<br>Control: 30 (39%) | Intervention: 40 (52%)<br>Control: 47 (61%) | Number of participants who had ROP requiring treatment, adverse events, and death |

|              |             |                                                |           |                                                                                                                                                                                                                                    |                                                                             |                                                             |                                                             |                                      |                          |                         |                          |                                               |                                               |                                                                                      |
|--------------|-------------|------------------------------------------------|-----------|------------------------------------------------------------------------------------------------------------------------------------------------------------------------------------------------------------------------------------|-----------------------------------------------------------------------------|-------------------------------------------------------------|-------------------------------------------------------------|--------------------------------------|--------------------------|-------------------------|--------------------------|-----------------------------------------------|-----------------------------------------------|--------------------------------------------------------------------------------------|
| Basu 2019    | Vitamin A   | 10,000 IU                                      | Enterally | Starting at 24 h of life (total 14 doses) for 28 days                                                                                                                                                                              | Intervention: 17.6 ± 7.0 at baseline<br><br>Control: 17.5 ± 6.7 at baseline | 98                                                          | 98                                                          | 30.9 ± 2.9                           | 30.7 ± 2.7               | 1185 ± 194              | 1163 ± 181               | Intervention: 54 (55.1%), placebo: 56 (57.1%) | Intervention: 44 (44.9%), placebo: 42 (42.9%) | Number of participants who had ROP requiring treatment, adverse events, and deaths   |
| Korkmaz 2016 | Propranolol | 0.5 mg/kg/6 hours at 30 minutes before feeding | Oral      | Propranolol was administered to stage 0 ROP patients at the end of phase 1 (i.e. the obliteration phase when VEGF levels were low) and at the beginning of phase 2 (i.e. neovascularization phase when VEGF levels were elevated). | NR                                                                          | Stage 0 ROP= 26, Stage 1 ROP= 30, Stage 2 ROP=27 (TOTAL=83) | Stage 0 ROP= 30, Stage 1 ROP=32, Stage 2 ROP= 26 (TOTAL=88) | Stage 0 ROP= Median ± SD= 29.0 ± 2.1 | Stage 0 ROP = 29.0 ± 1.5 | Stage 0 ROP= 1099 ± 319 | Stage 0 ROP = 1054 ± 233 | NR                                            | NR                                            | Incidence of BPD, RDS, IVH, PDA, NEC, ROP, platelet count, platelet mass index (PMI) |

|                |             |                                                |      |                                                                                                                                                                                               |    |                                                                                             |                                                                                    |                                  |                                         |                                  |                                            |                                                                     |                                                                      |                                                                                                    |
|----------------|-------------|------------------------------------------------|------|-----------------------------------------------------------------------------------------------------------------------------------------------------------------------------------------------|----|---------------------------------------------------------------------------------------------|------------------------------------------------------------------------------------|----------------------------------|-----------------------------------------|----------------------------------|--------------------------------------------|---------------------------------------------------------------------|----------------------------------------------------------------------|----------------------------------------------------------------------------------------------------|
| Ozturk<br>2019 | Propranolol | 2 mg/kg/day<br>30 minutes<br>before<br>feeding | Oral | Propranolol<br>treatment<br>was given in<br>the second<br>phase of the<br>disease (this<br>phase is the<br>neovasculari-<br>zation phase<br>and is also<br>known as<br>the essential<br>phase | NR | Stage 0<br>ROP=<br>19,<br>Stage 1<br>ROP=<br>19,<br>Stage 2<br>ROP=<br>20<br>(TOTAL<br>=68) | Stage 0<br>ROP= 29,<br>Stage 1<br>ROP= 21,<br>Stage 2<br>ROP=<br>18(TOTAL<br>L=68) | Stage 0<br>ROP=<br>29.0 ±<br>1.1 | Stage<br>0<br>ROP<br>=<br>29.0<br>± 1.3 | Stage 0<br>ROP=<br>1089 ±<br>219 | Stage<br>0<br>ROP<br>=<br>1064<br>±<br>203 | Stage 0<br>ROP=<br>Control:<br>11/29,<br>Interven-<br>tion:<br>9/19 | Stage 0<br>ROP=<br>Control:<br>18/29,<br>Interven-<br>tion:<br>10/19 | Plus<br>disease<br>detection<br>in retinal<br>exam<br>increase<br>in ROP<br>stage, use<br>of laser |
|----------------|-------------|------------------------------------------------|------|-----------------------------------------------------------------------------------------------------------------------------------------------------------------------------------------------|----|---------------------------------------------------------------------------------------------|------------------------------------------------------------------------------------|----------------------------------|-----------------------------------------|----------------------------------|--------------------------------------------|---------------------------------------------------------------------|----------------------------------------------------------------------|----------------------------------------------------------------------------------------------------|

|              |             |                               |      |                                                                                      |    |    |    |               |               |             |             |                                                 |                                                 |                                                                                                                                                                                                                                                                        |
|--------------|-------------|-------------------------------|------|--------------------------------------------------------------------------------------|----|----|----|---------------|---------------|-------------|-------------|-------------------------------------------------|-------------------------------------------------|------------------------------------------------------------------------------------------------------------------------------------------------------------------------------------------------------------------------------------------------------------------------|
| Sanghvi 2017 | Propranolol | 0.5 mg/kg/dose every 12 hours | Oral | 7 days until after 37 week or complete vascularization of retina whichever was later | NR | 55 | 54 | 29.54 (±1.69) | 29.12 (±1.74) | 1235 (±280) | 1155 (±284) | Intervention: 24 (43.6%)<br>Control: 29 (53.7%) | Intervention: 31 (56.4%)<br>Control: 25 (46.3%) | Number of participants who had ROP of any stage, Number of participants who had ROP requiring treatment, Number of participants who had ROP stage 1, Number of participants who had ROP stage 2, Number of participants who had ROP stage 3, Adverse events, and death |
|--------------|-------------|-------------------------------|------|--------------------------------------------------------------------------------------|----|----|----|---------------|---------------|-------------|-------------|-------------------------------------------------|-------------------------------------------------|------------------------------------------------------------------------------------------------------------------------------------------------------------------------------------------------------------------------------------------------------------------------|

|                                                                                                                                                                                                                                                                           |                                           |                                                                      |      |                                                       |                                                                                                                                                                                                                          |     |     |             |             |            |            |                                                 |                                                 |                                                                                                                                                                                                                                                                                                                                |
|---------------------------------------------------------------------------------------------------------------------------------------------------------------------------------------------------------------------------------------------------------------------------|-------------------------------------------|----------------------------------------------------------------------|------|-------------------------------------------------------|--------------------------------------------------------------------------------------------------------------------------------------------------------------------------------------------------------------------------|-----|-----|-------------|-------------|------------|------------|-------------------------------------------------|-------------------------------------------------|--------------------------------------------------------------------------------------------------------------------------------------------------------------------------------------------------------------------------------------------------------------------------------------------------------------------------------|
| Hellström 2021                                                                                                                                                                                                                                                            | Arachidonic acid and docosahexaenoic acid | Arachidonic acid (100 mg/kg/d) and docosahexaenoic acid (50 mg/kg/d) | Oral | 3 days after birth until 40 weeks' postmenstrual age. | Arachidonic acid: 12.6 (±2.4) mol% in the intervention group vs 12.6 (±2.6) mol% in the control group<br><br>Docosahexaenoic acid: 2.28 (±0.68) mol% in the intervention group vs 2.37 (±0.82) mol% in the control group | 101 | 105 | 25.5 (±1.5) | 25.5 (±1.4) | 797 (±197) | 777 (±197) | Intervention: 58 (57.4%)<br>Control: 59 (56.2%) | Intervention: 43 (42.6%)<br>Control: 46 (43.8%) | Number of participants who had ROP of any stage, Number of participants who had ROP requiring treatment, Number of participants who had ROP stage 1, Number of participants who had ROP stage 2, Number of participants who had ROP stage 3, Number of participants who had prethreshold ROP type 1, Adverse events, and death |
| <b>IM, intramuscular; IU, international unit; ROP, retinopathy of prematurity; BPD, bronchopulmonary dysplasia; PDA, patent ductus arteriosus; IVH, intraventricular hemorrhage; RDS, respiratory distress syndrome; NEC, necrotizing enterocolitis; NR, not reported</b> |                                           |                                                                      |      |                                                       |                                                                                                                                                                                                                          |     |     |             |             |            |            |                                                 |                                                 |                                                                                                                                                                                                                                                                                                                                |
